# Supplementary material for: Nanoporous Au Behavior in Methyl Orange Solutions
Source: MDPI journal article supplement (doi:10.3390/molecules29091950), 2024-04-24
Supplement: s1 [file s1]

## *Supplementary Materials for the Article*

### **Nanoporous Au behavior in methyl orange solutions**

**Andrea Pinna <sup>1</sup>, Giorgio Pia <sup>1,\*</sup>, Nicola Melis <sup>1</sup>, Mirko Prato <sup>2</sup>, Maria Giorgia Cutrufello <sup>3,4</sup>, Elisa Sogne <sup>5</sup>,  
Andrea Falqui <sup>6</sup> and Luca Pilia <sup>1,\*</sup>**

<sup>1</sup> Department of Mechanical, Chemical and Materials Engineering, University of Cagliari, Via Marengo 2, 09123 Cagliari, Italy; andrea.pinna94@unica.it (A.P.); nicola.melis87@unica.it (N.M.)

<sup>2</sup> Materials Characterization Facility, Italian Institute of Technology, Via Morego 30, 16163 Genoa, Italy; mirko.prato@iit.it

<sup>3</sup> Department of Chemical and Soil Sciences, University of Cagliari, S.P. Monserrato-Sestu Km 0.700, 09042 Cagliari, Italy; gcutrufe@unica.it

<sup>4</sup> National Interuniversity Consortium of Materials Science and Technology (INSTM), Via Giuseppe Giusti 9, 50121 Firenze, Italy

<sup>5</sup> PoliFAB, Polytechnic of Milan, Via Giuseppe Colombo, 81, 20133 Milan, Italy; elisa.sogne@polimi.it

<sup>6</sup> Department of Physics "Aldo Pontremoli", University of Milan, Via Celoria 16, 20133 Milano, Italy; andrea.falqui@unimi.it

\* Correspondence: giorgio.pia@unica.it (G.P.); e-mail: luca.pilia@unica.it (L.P.); Tel.: +39-0706755063 (L.P.)

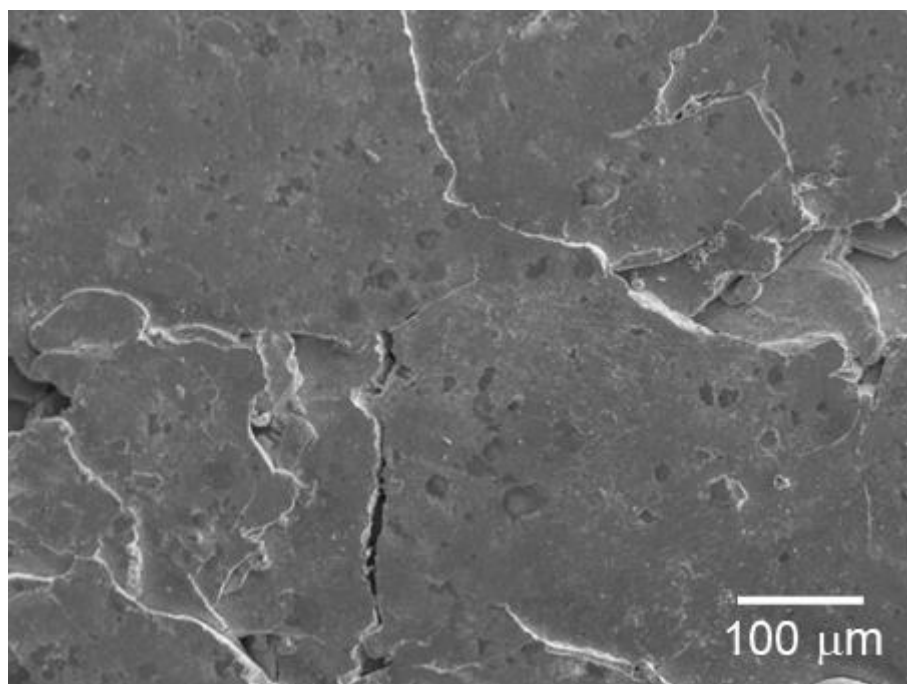

**Figure S1.** SEM image of the pellet before the chemical corrosion in  $\text{HNO}_3$  70% for 24 h.

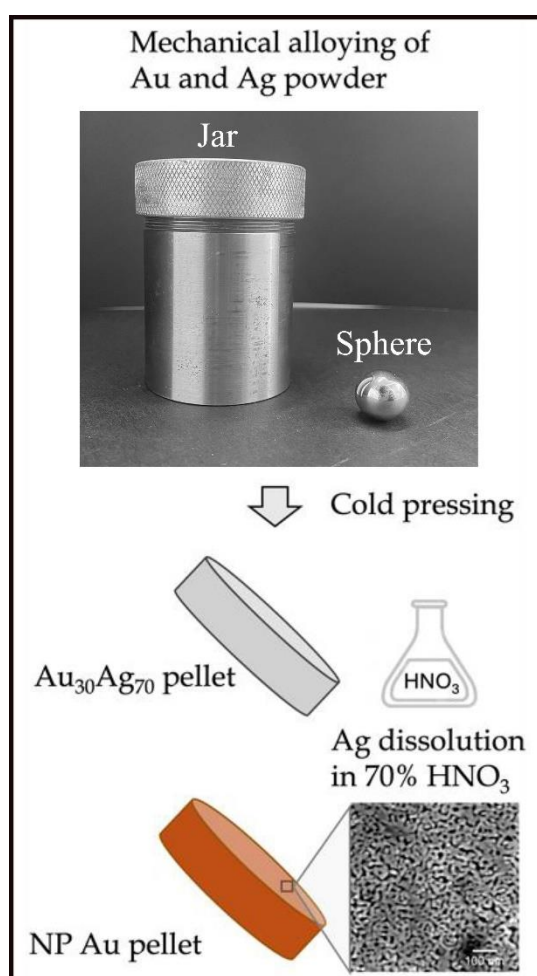

**Figure S2.** Schematic representation of the nanoporous gold fabrication process.

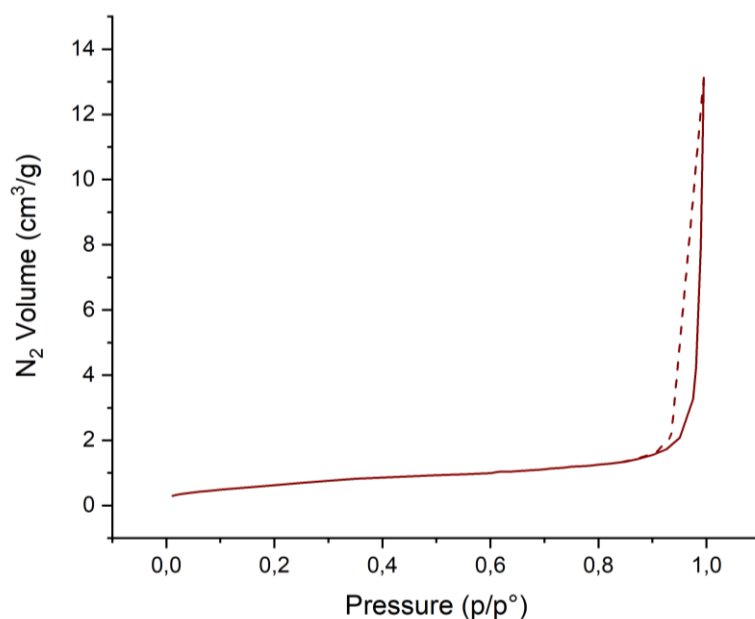

**Figure S3.** N<sub>2</sub> gas adsorption-desorption isotherm for the nanoporous gold pellet.

Textural analysis of an NP Au pellet was carried out with an ASAP 2020 system (Micromeritics), by determining the nitrogen adsorption-desorption isotherms at  $-196\text{ }^{\circ}\text{C}$ . Before analysis, the sample was heated overnight under vacuum up to  $200\text{ }^{\circ}\text{C}$  (heating rate,  $1\text{ }^{\circ}\text{C}/\text{min}$ ). Surface area was calculated by the Brunauer-Emmett-Teller (BET) equation. The BET analysis based on the measurement reported in Figure S3 gave a value of surface area of roughly  $2.5\text{ m}^2/\text{g}$ . According to the paper by Wittstock *et al.* [1], in the case of NP Au, this approach could lead to an underestimation of the real surface area of the pristine NP.

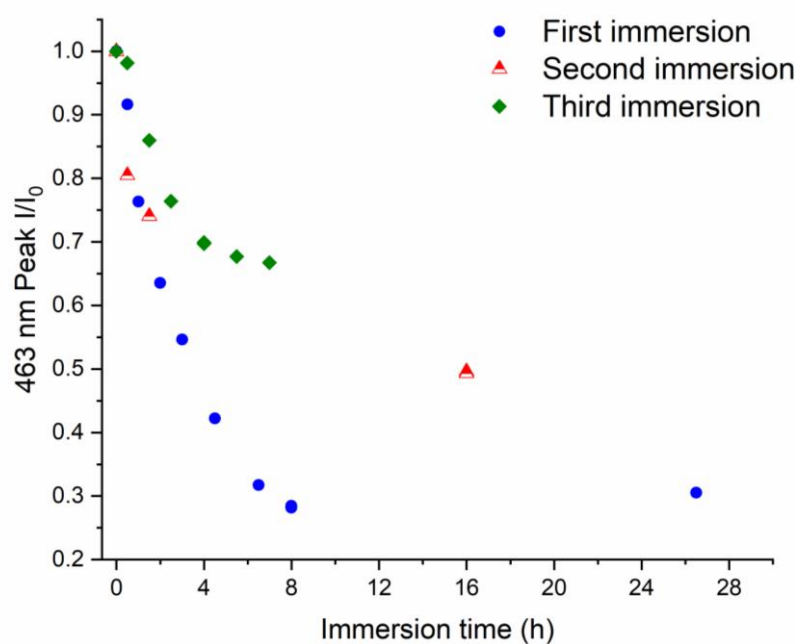

**Figure S4.** Relative concentration of MO over time for the same sample repeatedly immersed in fresh MO solution.

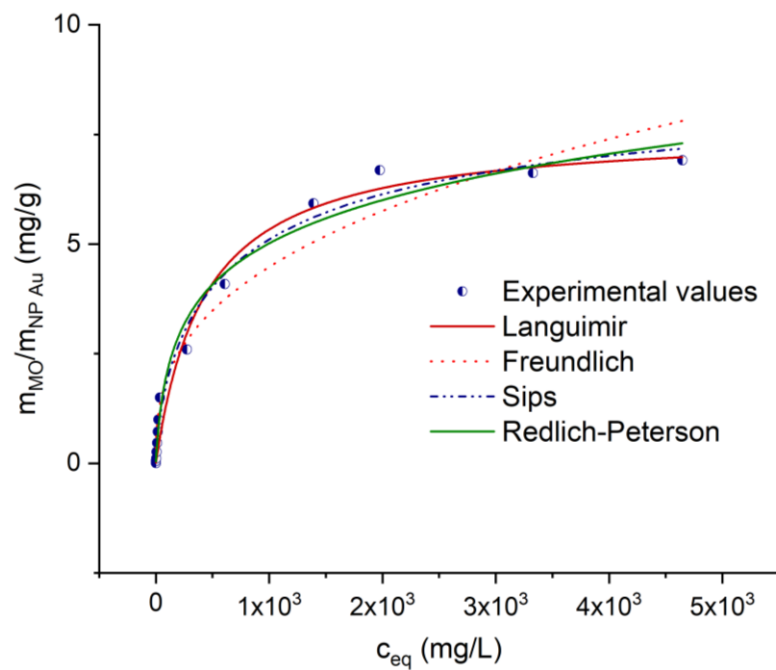

**Figure S5.** Comparison between several adsorption models. The best fitting is given by the Langmuir one.

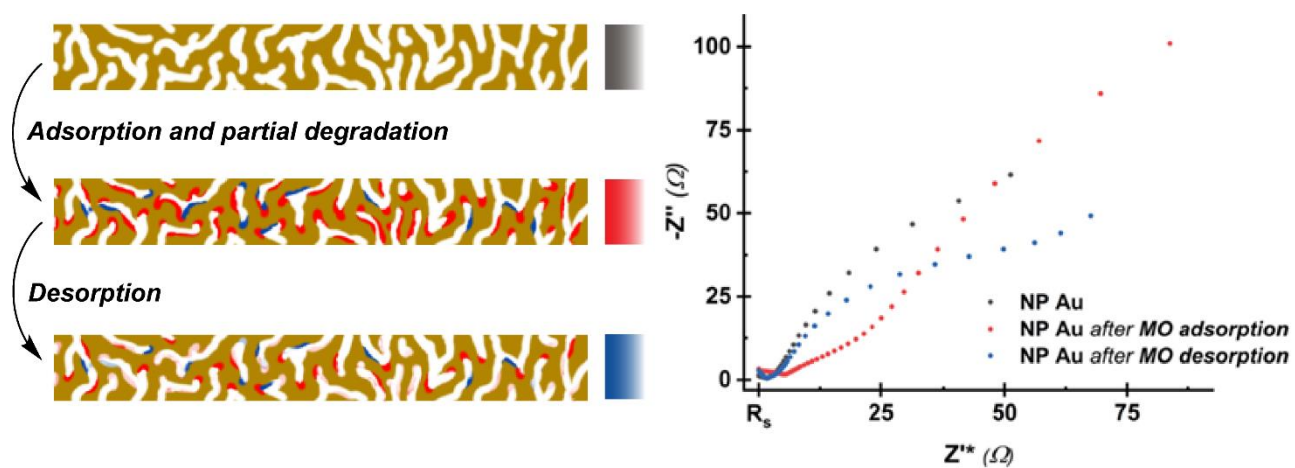

**Scheme S1.** Schematic illustration of adsorption and desorption process (left), and related Electrochemical Impedance Spectroscopy measurements (right).

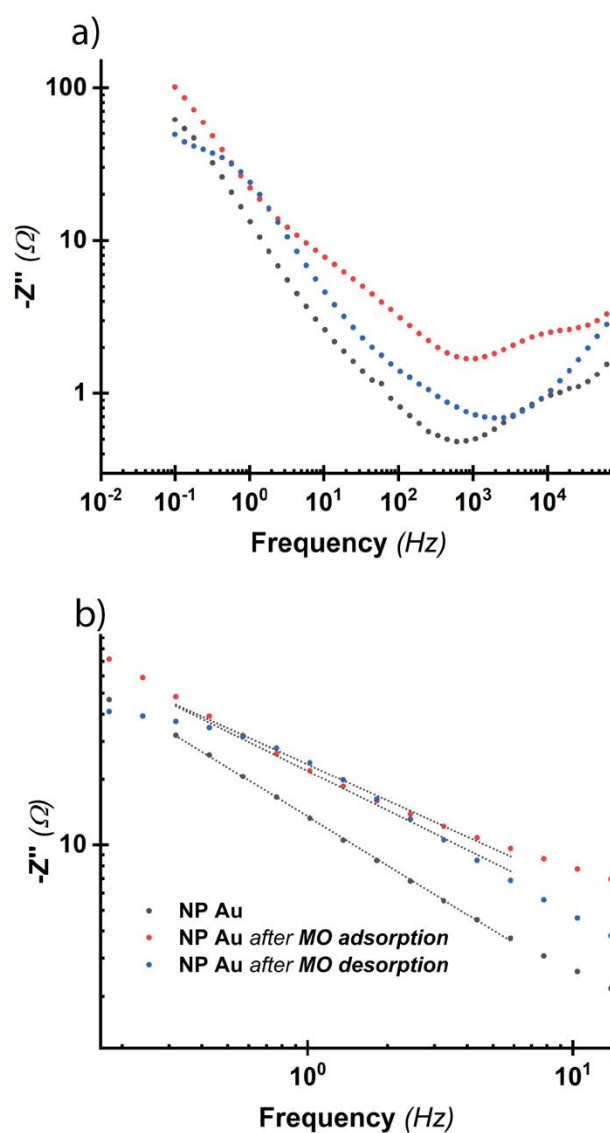

**Figure S6.** (a) Log-log dependance of the imaginary part of the impedance vs. frequency. (b) Magnitude and fit of the linear part in the medium-to-low frequencies.

#### Reference

1. Wittstock, G.; Bäumer, M.; Dononelli, W.; Klüner, T.; Lühns, L.; Mahr, C.; Moskaleva, L.V.; Oezaslan, M.; Risse, T.; Rosenauer, A.; et al. Nanoporous Gold: From Structure Evolution to Functional Properties in Catalysis and Electrochemistry. *Chem. Rev.* **2023**, *123*, 6716–6792. <https://doi.org/10.1021/acs.chemrev.2c00751>.
